# Supplementary material for: Cu2O-Based Electrochemical Biosensor for Non-Invasive and Portable Glucose Detection
Source: MDPI journal article supplement (doi:10.3390/bios12030174), 2022-03-14
Supplement: s1 [file s1]

# Non-enzymatic Cu<sub>2</sub>O-based Electrochemical Sensor for Non-Invasive Portable Glucose Detection

Fabiane Fantinelli Franco <sup>1</sup>, Richard A. Hogg<sup>2</sup>, Libu Manjakkal <sup>2,\*</sup>

<sup>1</sup> Water and Environment Group, Infrastructure and Environment Division,  
James Watt School of Engineering, University of Glasgow, Glasgow, G12 8LT, UK.;  
Fabiane.FantinelliFranco@glasgow.ac.uk

<sup>2</sup> Electronic and Nanoscale Engineering, James Watt School of Engineering,  
University of Glasgow, Glasgow, G12 8LT, UK.; Richard.Hogg@glasgow.ac.uk;  
Libu.Manjakkal@glasgow.ac.uk;

\* Correspondence: Libu.Manjakkal@glasgow.ac.uk;

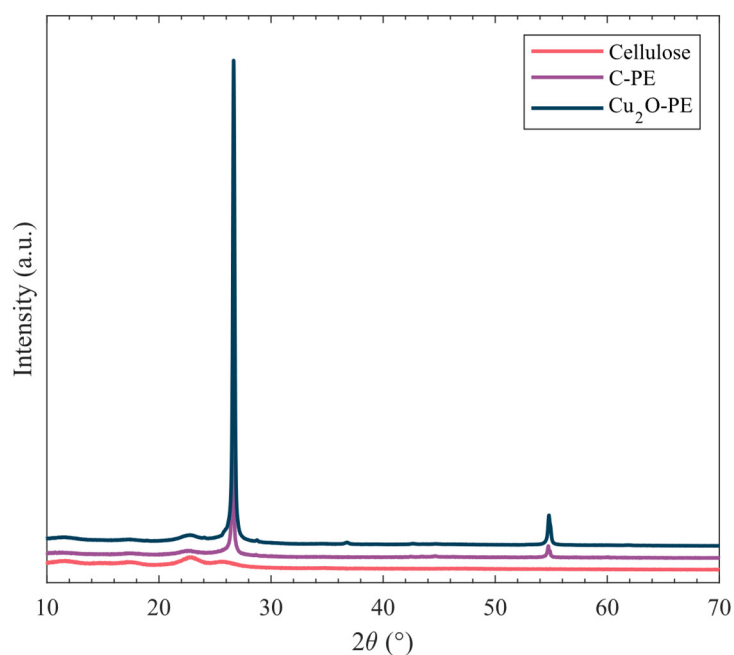

**Figure S1.** XRD spectrum of cellulose substrate, graphene paste printed on the cellulose substrate (C-PE), and Cu<sub>2</sub>O PE.

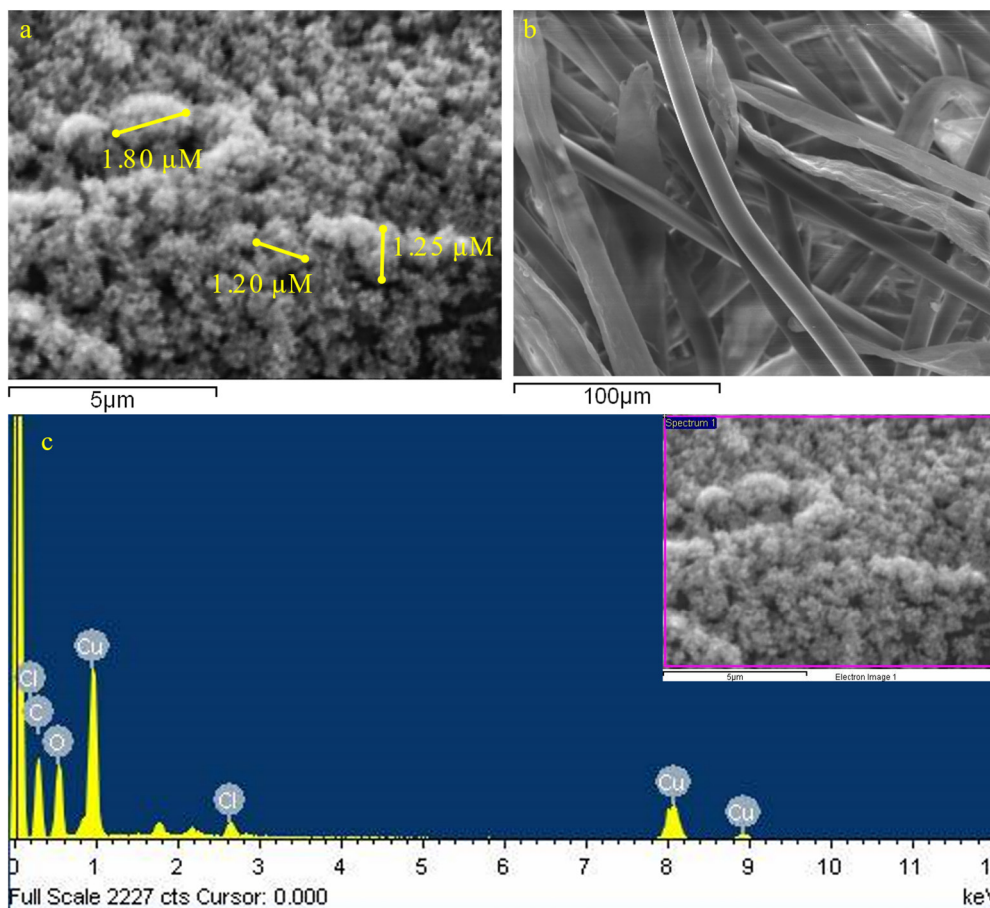

**Figure S2.** SEM images of the a)  $\text{Cu}_2\text{O}$  drop casted on the PEs and b) cellulose substrate. c) EDS spectrum of the  $\text{Cu}_2\text{O}$  drop casted on the PE with the SEM image inset.

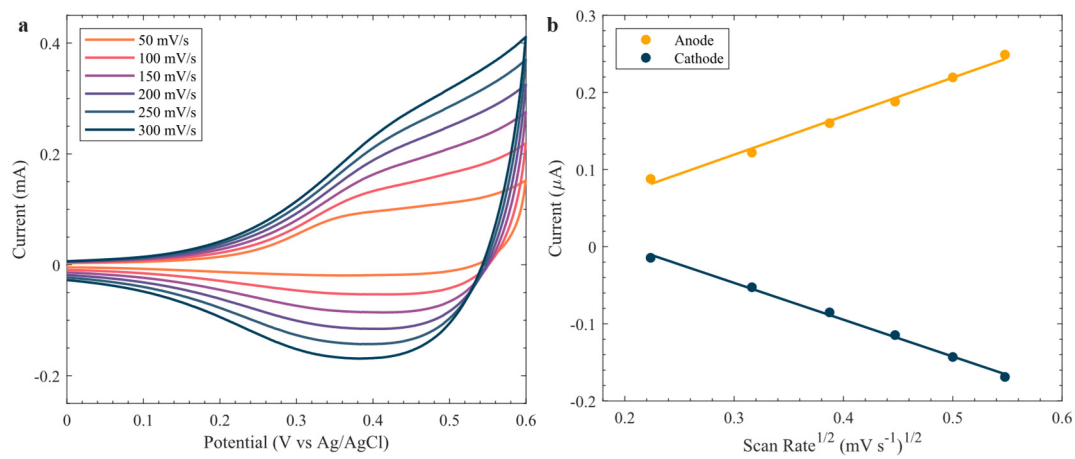

**Figure S3.** a) CV curves with changing scan rates (50 mV/s to 300 mV/s) of  $\text{Cu}_2\text{O}$  GCE with 1 mM glucose in 0.1 M NaOH. b) Relationship between peak current and square root of scan rate.

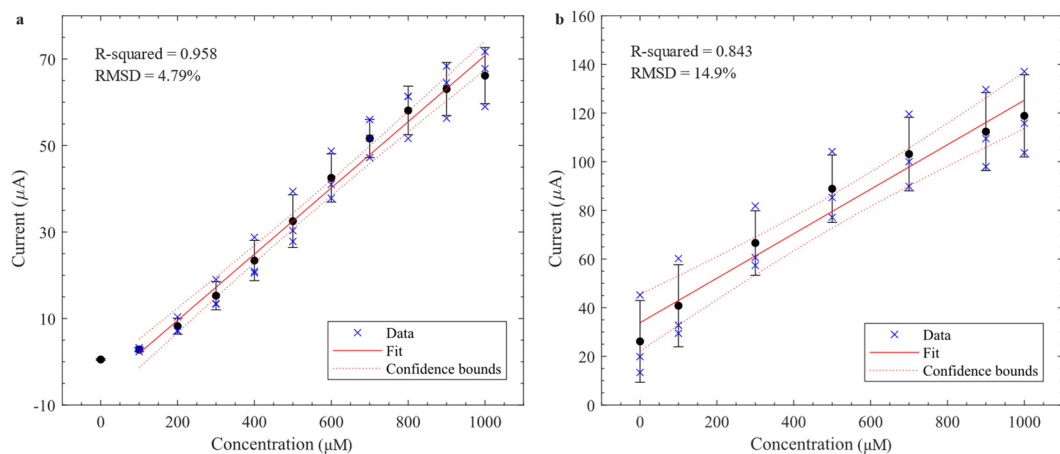

**Figure S4.** Unmodified calibration curves (without subtracting the baseline) of a)  $\text{Cu}_2\text{O}$  GCEs and b)  $\text{Cu}_2\text{O}$  PEs.

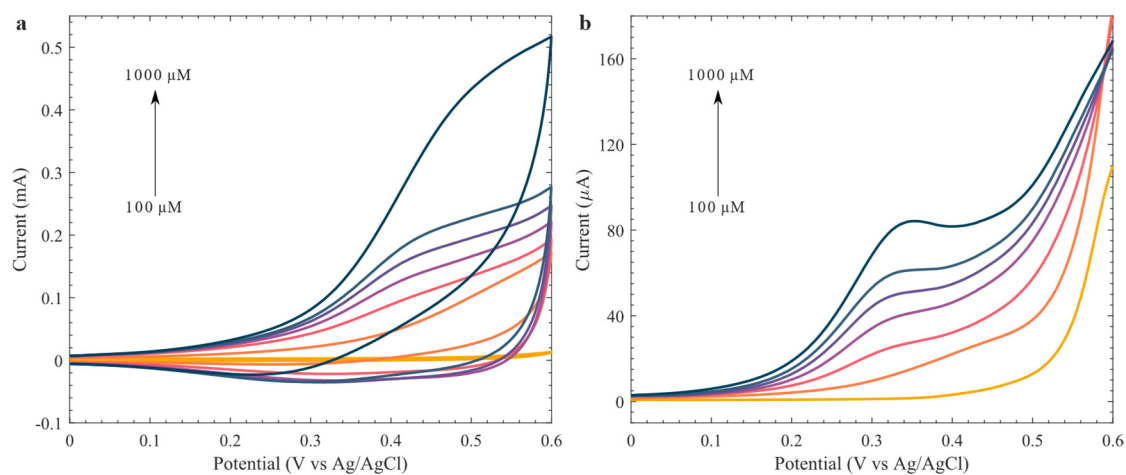

**Figure S5.** Unmodified calibration curves (without subtracting the baseline) of a)  $\text{Cu}_2\text{O}$  GCEs and b)  $\text{Cu}_2\text{O}$  PEs.
